# Supplementary material for: Design, Synthesis and Biological Evaluation of New Pyrimidine Derivatives as Anticancer Agents
Source: PubMed Central journal article supplement (PMC7867324; doi:10.3390/molecules26030771), 2021-02-02
Supplement: molecules-26-00771-s001.pdf [file molecules-26-00771-s001.pdf]

# Design, synthesis and biological evaluation of new pyrimidine derivatives as anticancer agents

Valentina Noemi Madia <sup>1,§</sup>, Alice Nicolai <sup>2,3,§</sup>, Antonella Messori <sup>1,\*</sup>, Alessandro De Leo <sup>1</sup>, Davide Ialongo <sup>1</sup>, Valeria Tudino <sup>1</sup>, Francesco Saccoliti <sup>4</sup>, Daniela De Vita <sup>5</sup>, Luigi Scipione <sup>1</sup>, Marco Artico <sup>2</sup>, Samanta Taurone <sup>2</sup>, Ludovica Taglieri <sup>3</sup>, Roberto Di Santo <sup>1</sup>, Susanna Scarpa <sup>3</sup>, and Roberta Costi <sup>1</sup>

<sup>§</sup> These authors contributed equally

<sup>1</sup> Istituto Pasteur-Fondazione Cenci Bolognetti, Dipartimento di Chimica e Tecnologie del Farmaco, "Sapienza" Università di Roma, p.le Aldo Moro 5, I-00185 Rome, Italy; valentinanoemi.madia@gmail.com (V.N.M.); antonella.messore@uniroma1.it (A.M.); alessandro.deleo@uniroma1.it (A.D.L.); ialongo.1679357@studenti.uniroma1.it (D.I.); valeria.tudino@uniroma1.it (V.T.); luigi.scipione@uniroma1.it (L.S.); roberto.disanto@uniroma1.it (R.D.S.); roberta.costi@uniroma1.it (R.C.)

<sup>2</sup> Department of Sensory Organs, "Sapienza" University of Rome, Viale del Policlinico 155, I-00161 Rome, Italy; marco.artico@uniroma1.it (M.A.); samanta.taurone@uniroma1.it (S.T.)

<sup>3</sup> Department of Experimental Medicine, "Sapienza" University of Rome, Viale Regina Elena 324, I-00161 Rome, Italy; alice.nicolai@uniroma1.it (A.N.); ludovica.taglieri@yahoo.it (L.T.); susanna.scarpa@uniroma1.it (S.S.)

<sup>4</sup> D3 PharmaChemistry, Italian Institute of Technology, Via Morego 30, I-16163 Genova, Italy; francesco.saccoliti@iit.it

<sup>5</sup> Department of Environmental Biology, "Sapienza" University of Rome, p.le Aldo Moro 5, I-00185, Rome, Italy; daniela.devita@uniroma1.it

\* Correspondence: antonella.messore@uniroma1.it; Tel.: +39-06-4991-3965

## Contents

NMR spectra for compounds **1b-g**, **2a-f** and **3**

Figure S1: NMR Spectra for **1b**;

Figure S2: NMR Spectra for **1c**;

Figure S3: NMR Spectra for **1d**;

Figure S4: NMR Spectra for **1e**;

Figure S5: NMR Spectra for **1e-HCl**;

Figure S6: NMR Spectra for **1f**;

Figure S7: NMR Spectra for **1g**;

Figure S8: NMR Spectra for **2a**;

Figure S9: NMR Spectra for **2b**;

Figure S10: NMR Spectra for **2c**;

Figure S11: NMR Spectra for **2d**;

Figure S12: NMR Spectra for **2e**;

Figure S13: NMR Spectra for **2f**;

Figure S14: NMR Spectra for **3**;

Figure S15: 2D-NMR spectra for compound **4a**

Figure S16: 2D-NMR spectra for the regioisomer of compound **4a** (namely **4a'**).

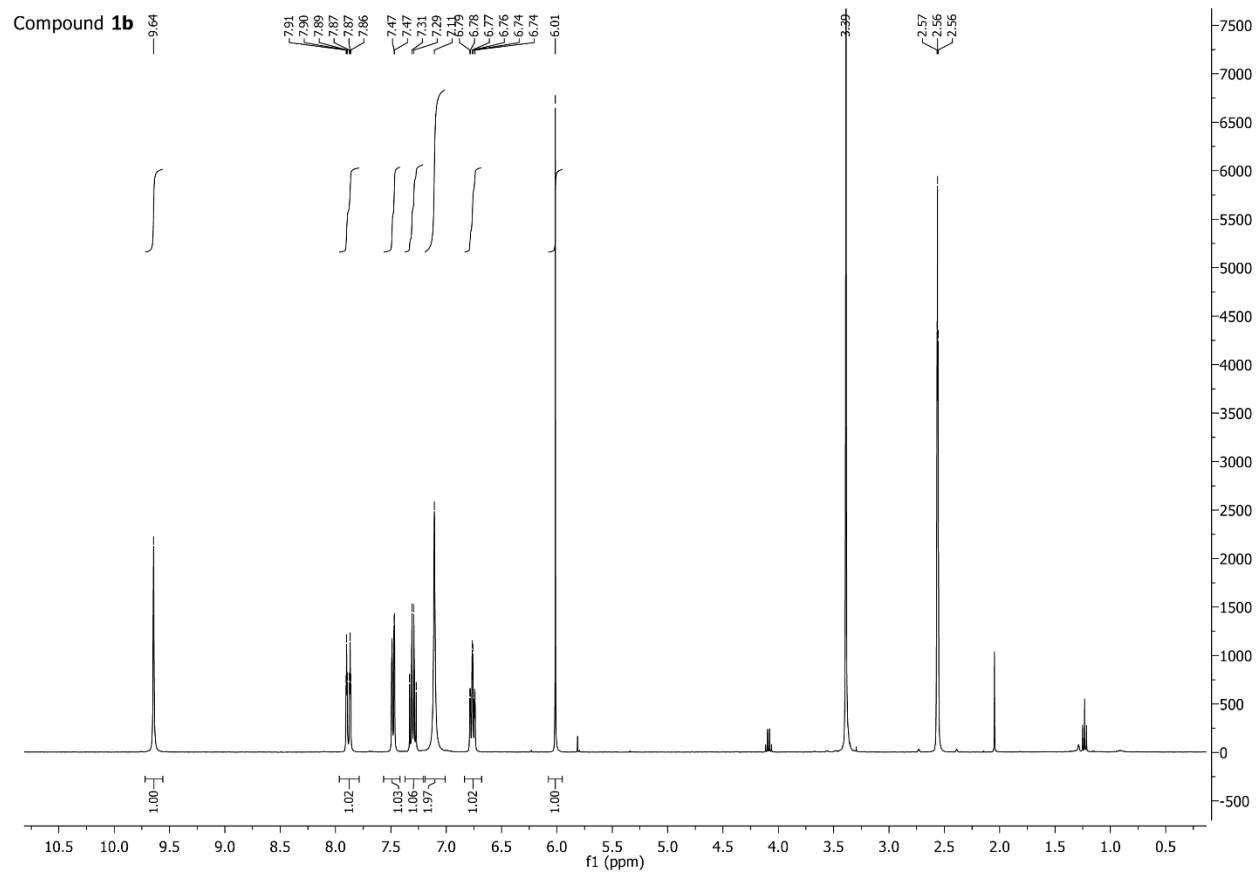

Figure S1. NMR (400 MHz, DMSO-*d*<sub>6</sub>) Spectrum for **1b**

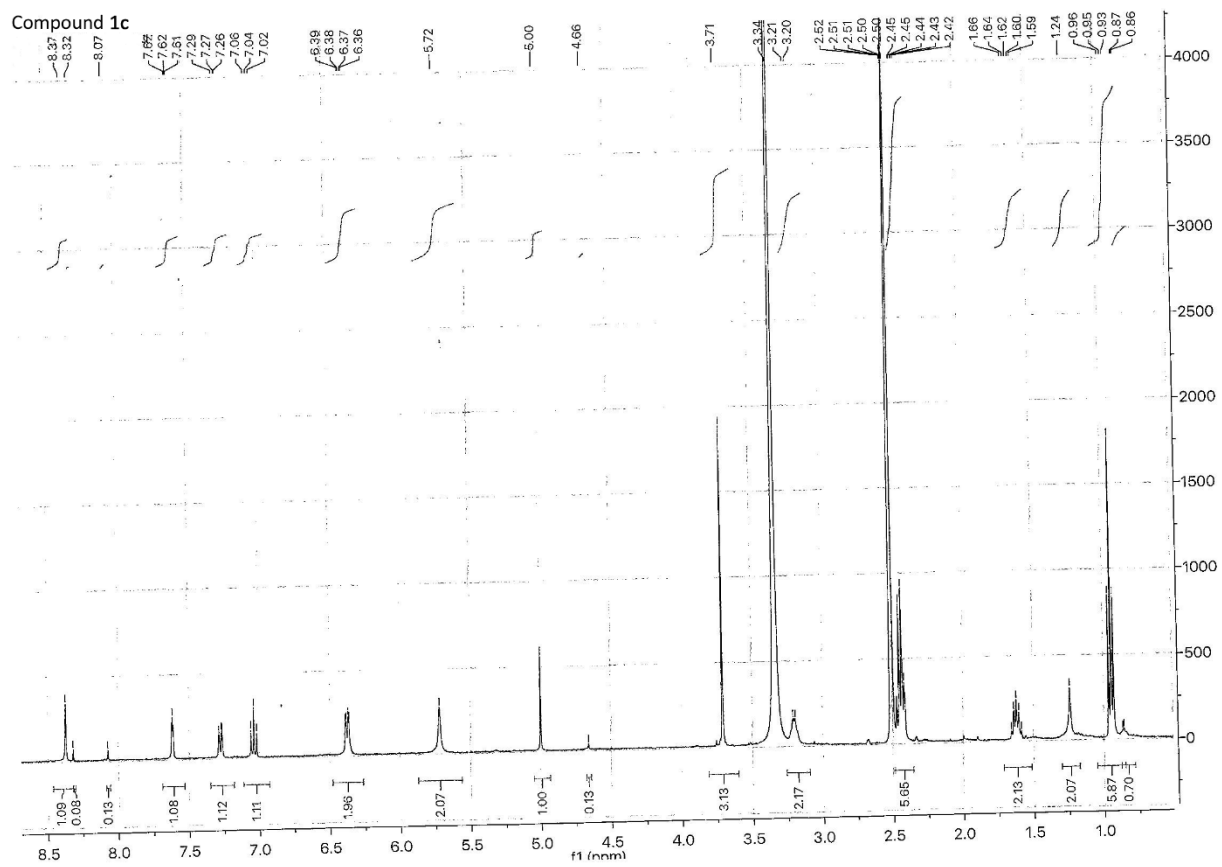

Figure S2. NMR (400 MHz, DMSO-*d*<sub>6</sub>) Spectrum for 1c

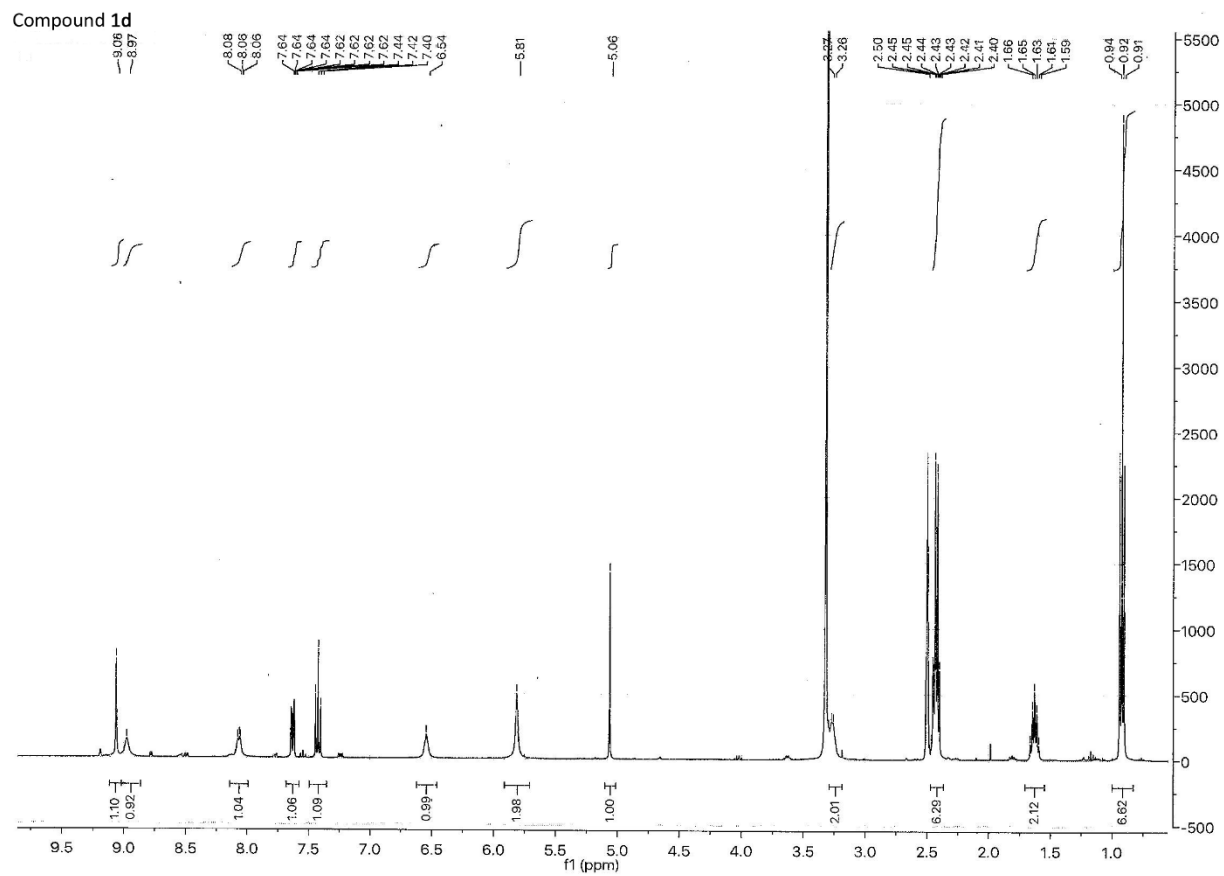

Figure S3. NMR (400 MHz, DMSO-*d*<sub>6</sub>) Spectrum for **1d**



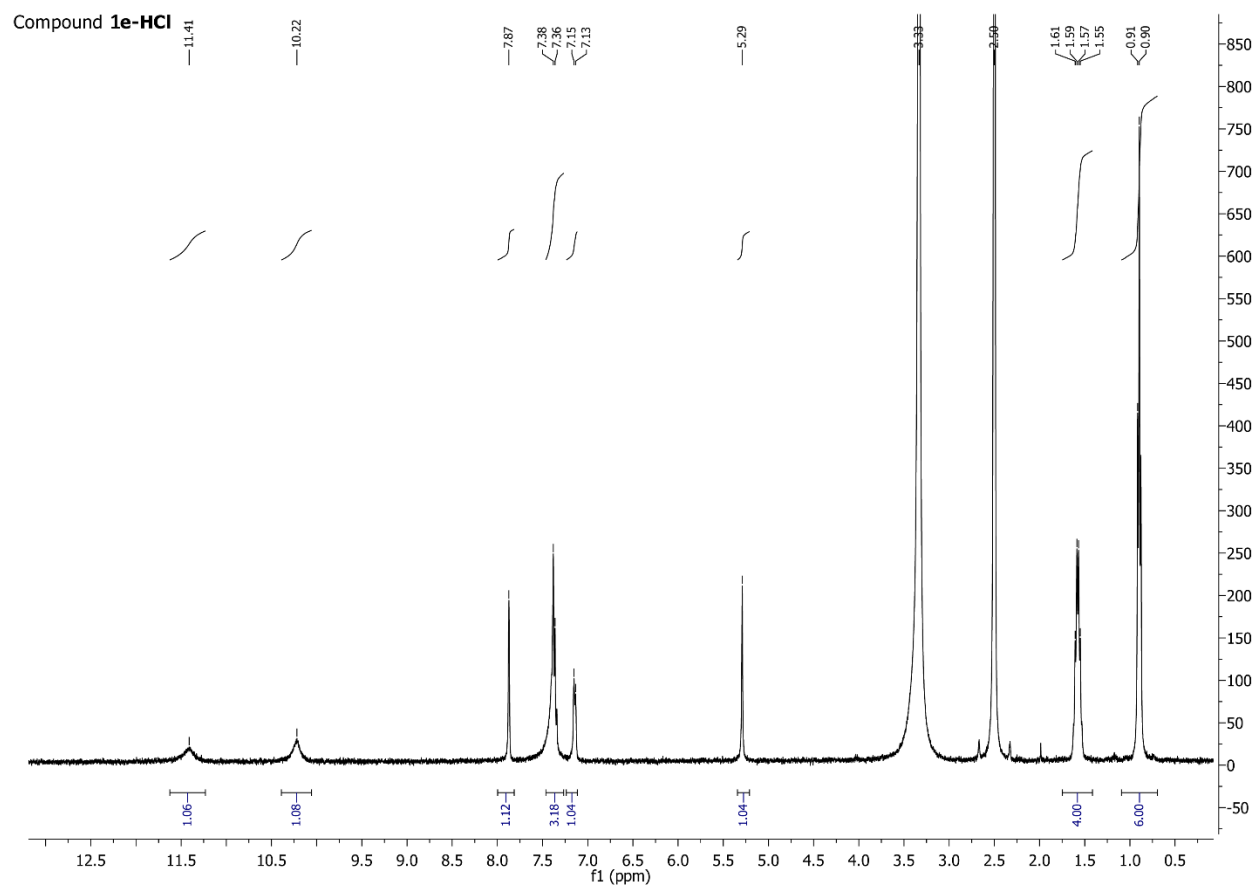

Compound **1f**

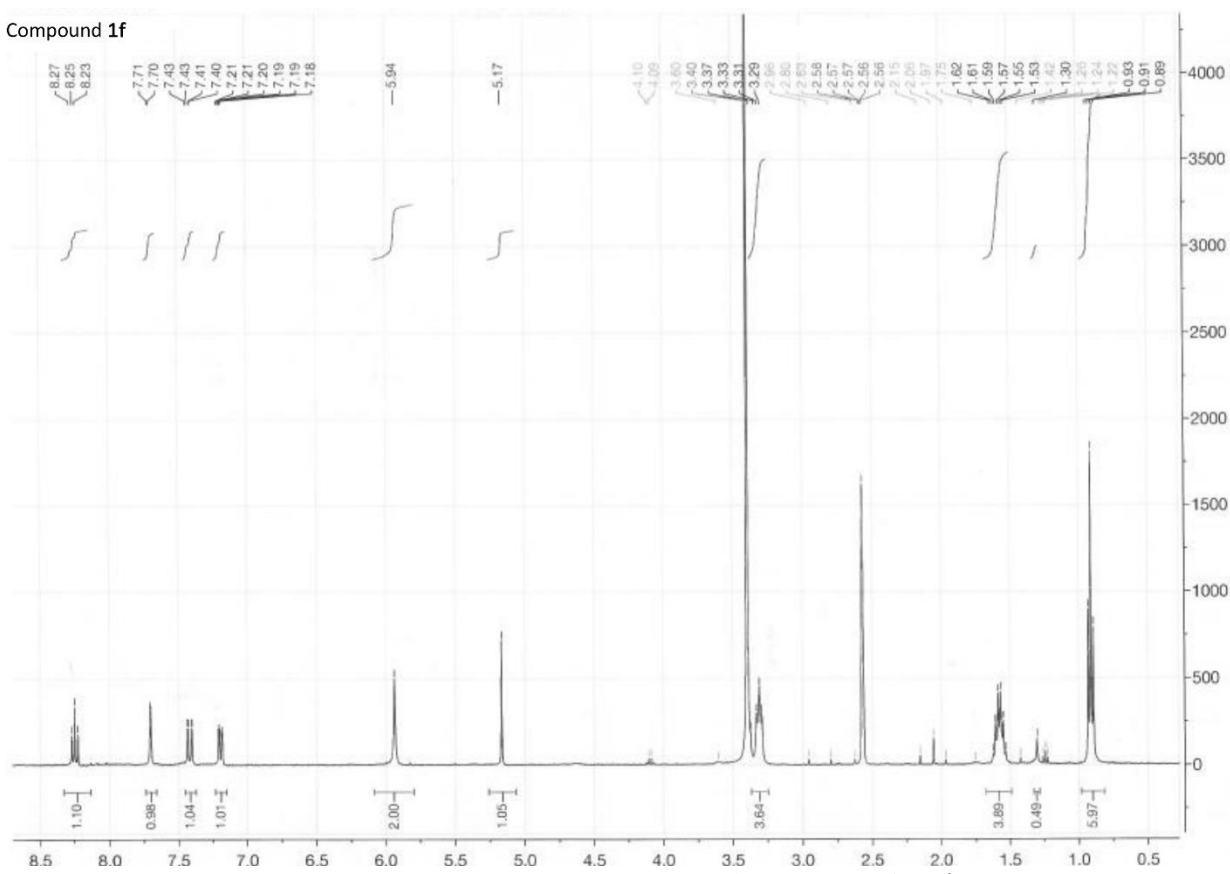

Figure S6. NMR (400 MHz, DMSO-*d*<sub>6</sub>) Spectrum for **1f**

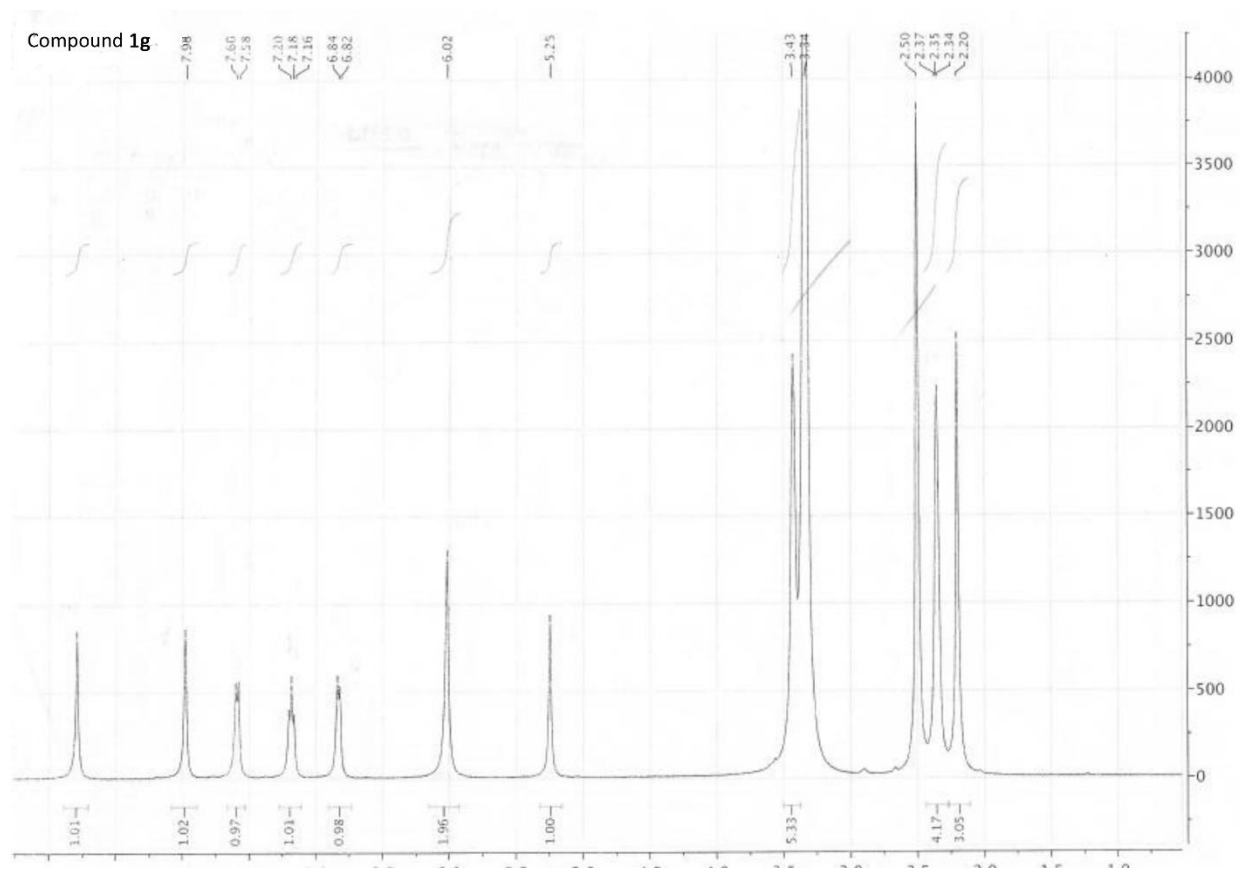

Figure S7. NMR (400 MHz, DMSO-*d*<sub>6</sub>) Spectrum for **1g**



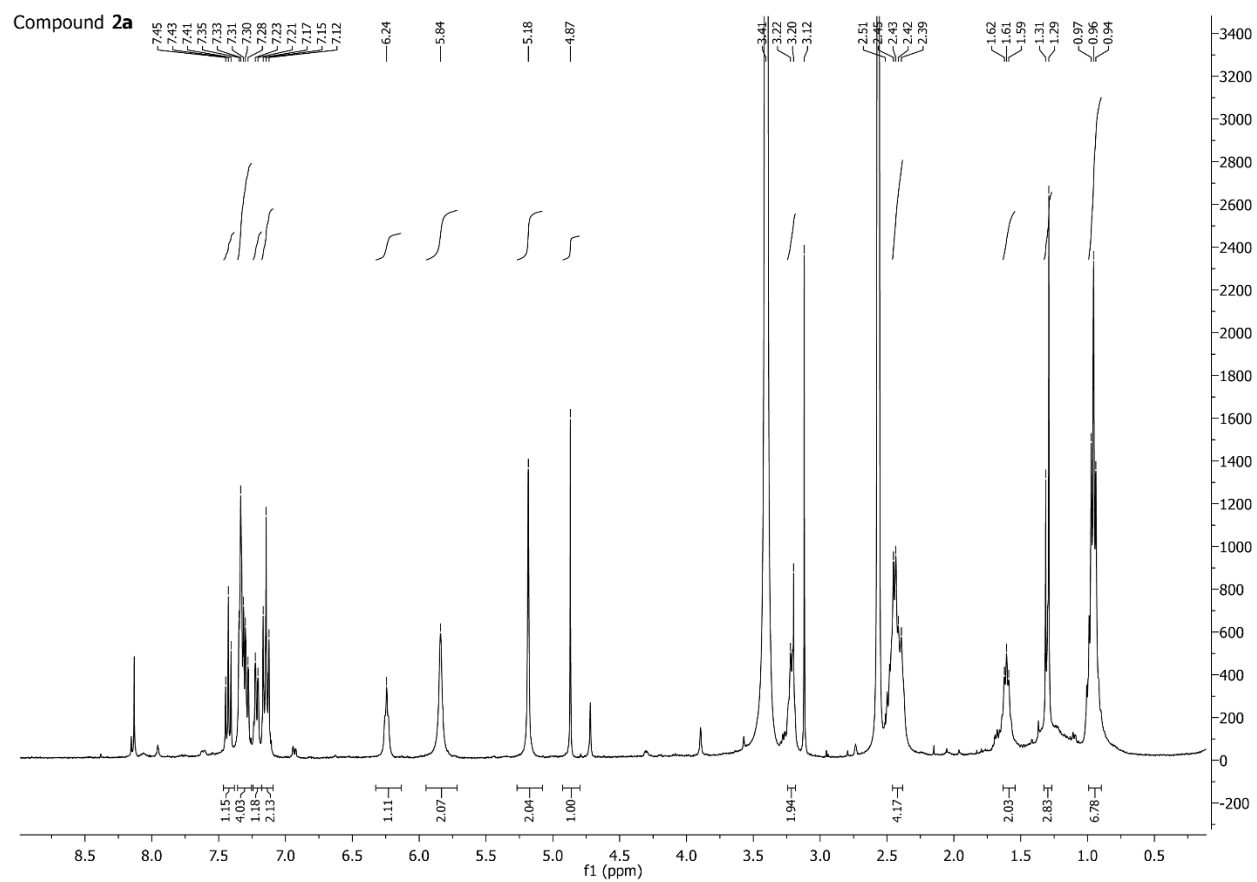

Figure S8. NMR (400 MHz, DMSO-*d*<sub>6</sub>) Spectrum for **2a**

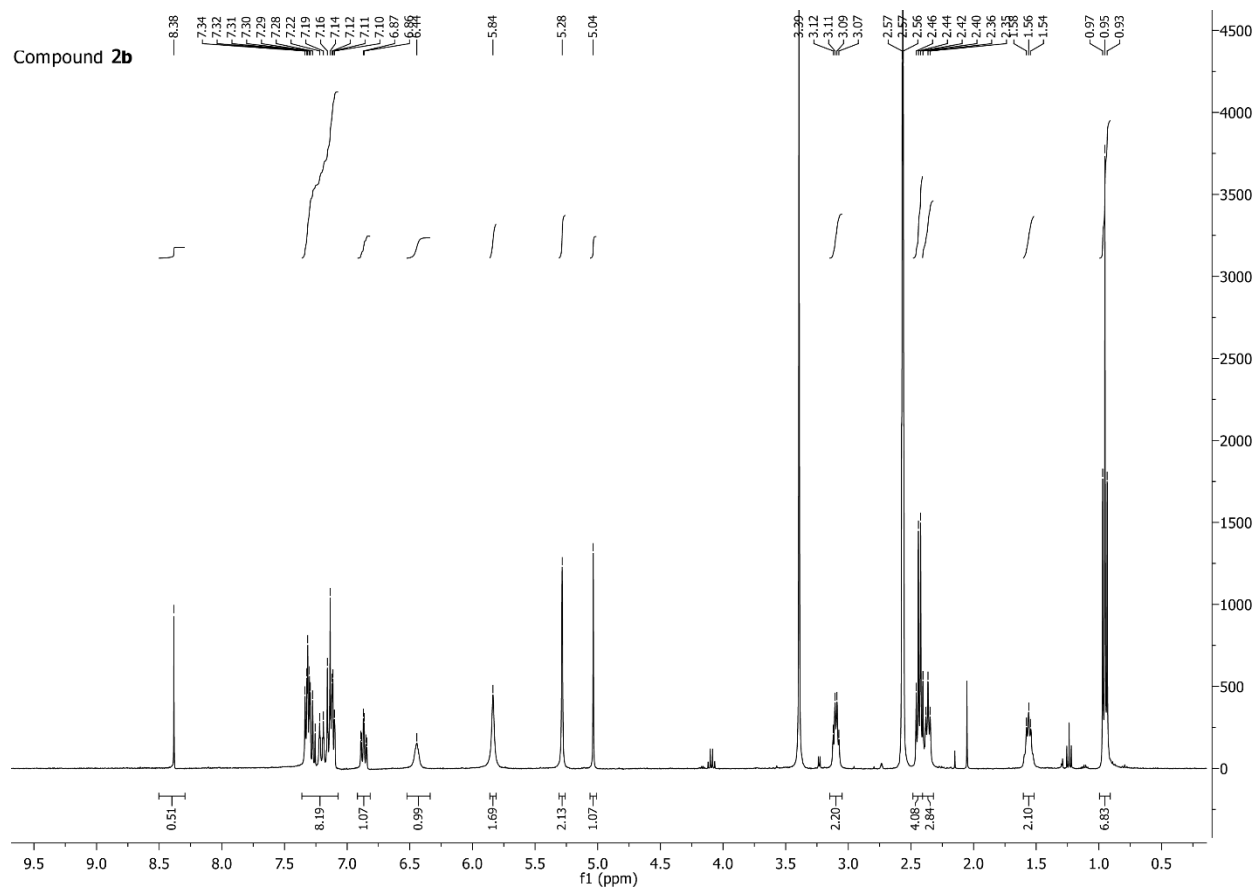

Figure S9. NMR (400 MHz, DMSO-*d*<sub>6</sub>) Spectrum for **2b**

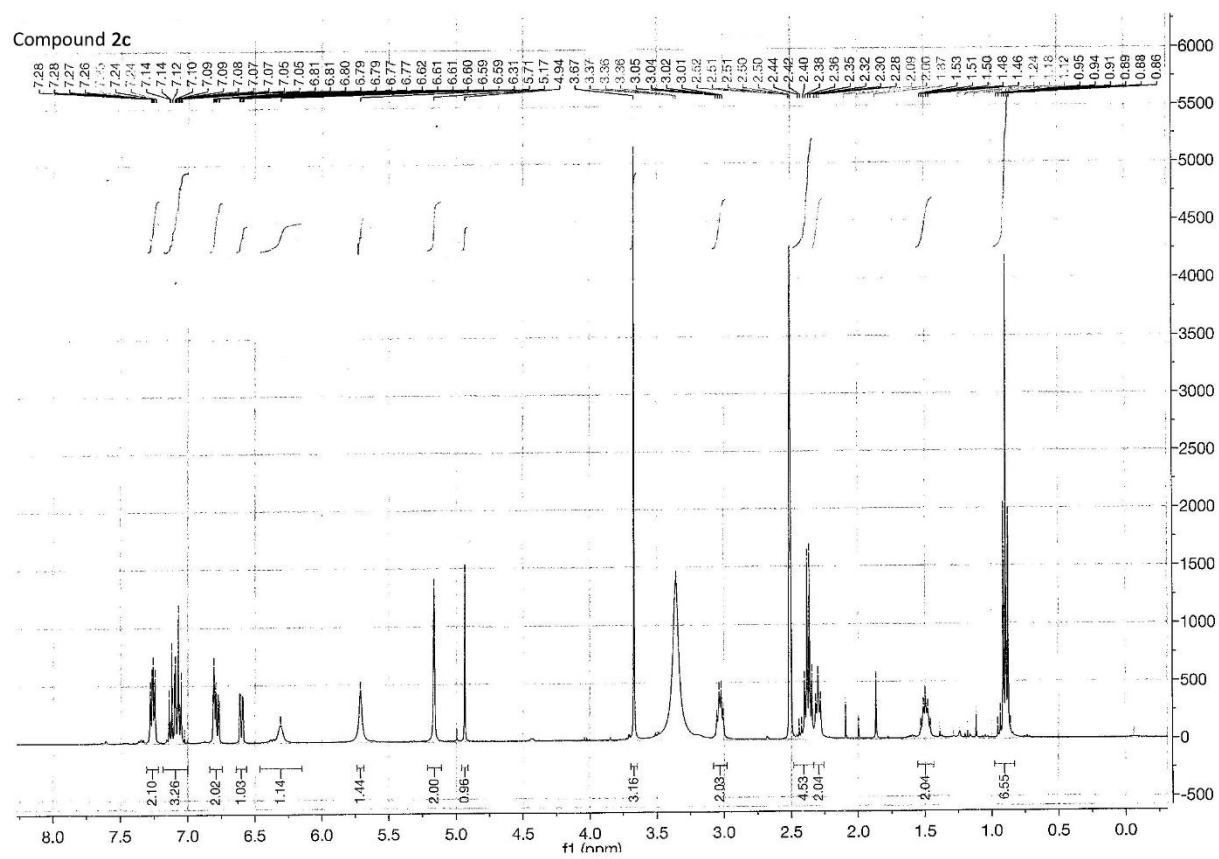

Figure S10. NMR (400 MHz, DMSO-*d*<sub>6</sub>) Spectrum for 2c

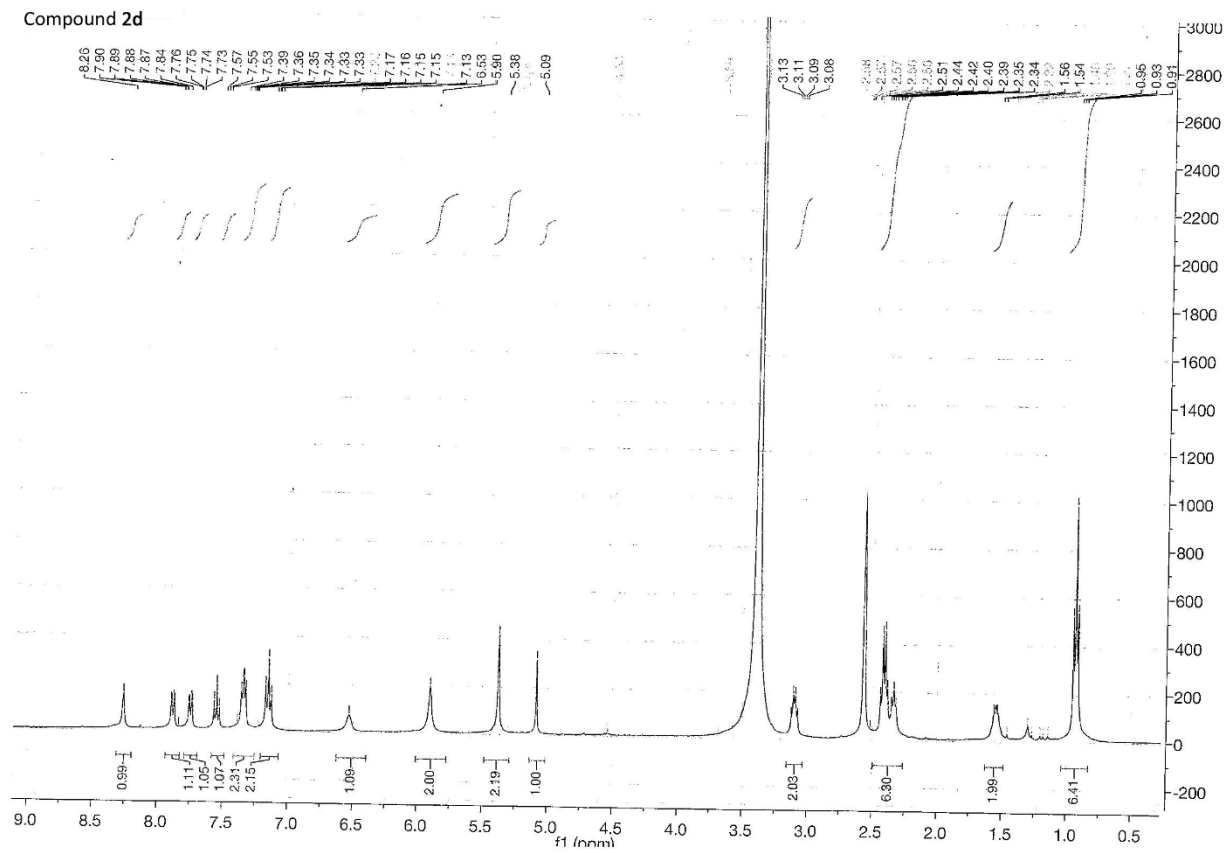

Figure S11. NMR (400 MHz, DMSO-*d*<sub>6</sub>) Spectrum for **2d**

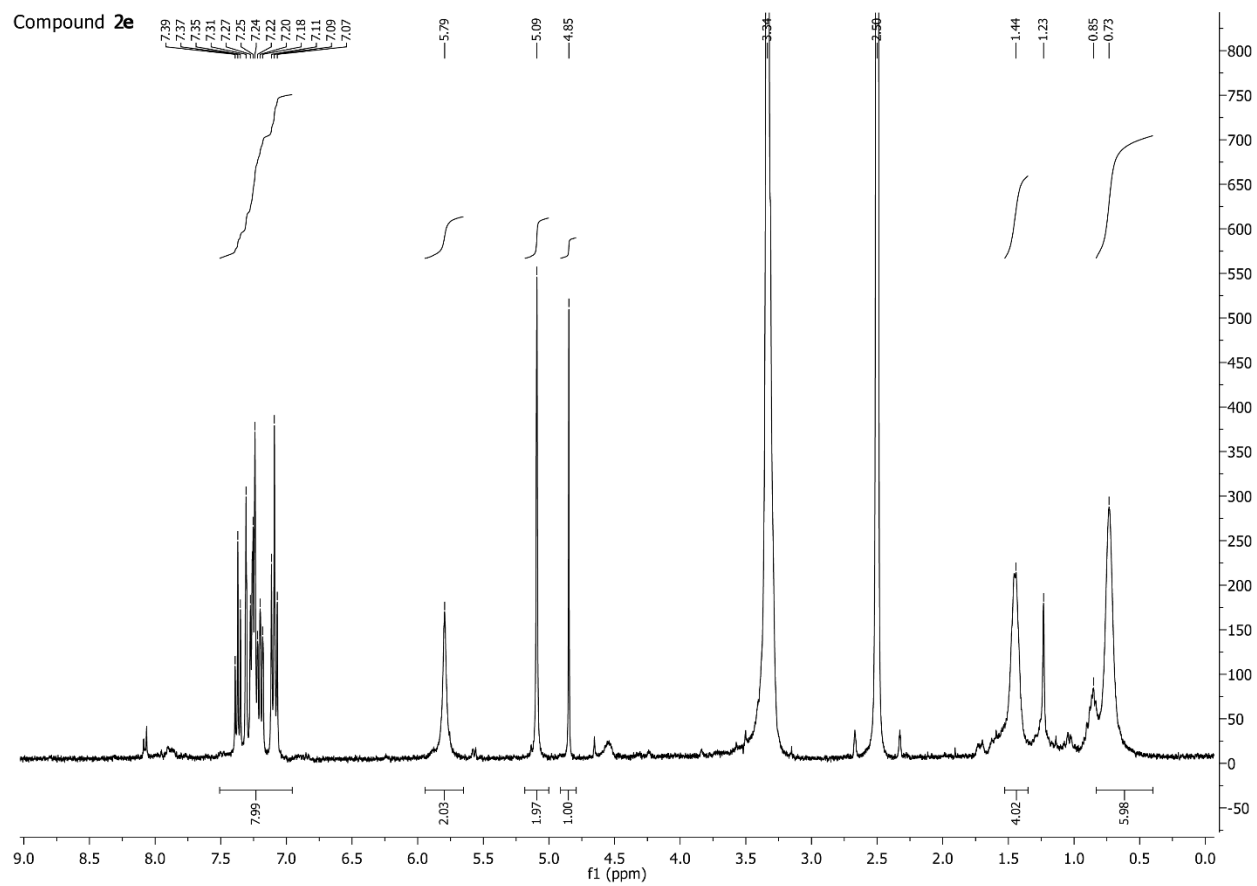

Figure S12. NMR (400 MHz, DMSO-*d*<sub>6</sub>) Spectrum for **2e**

Compound **2f**

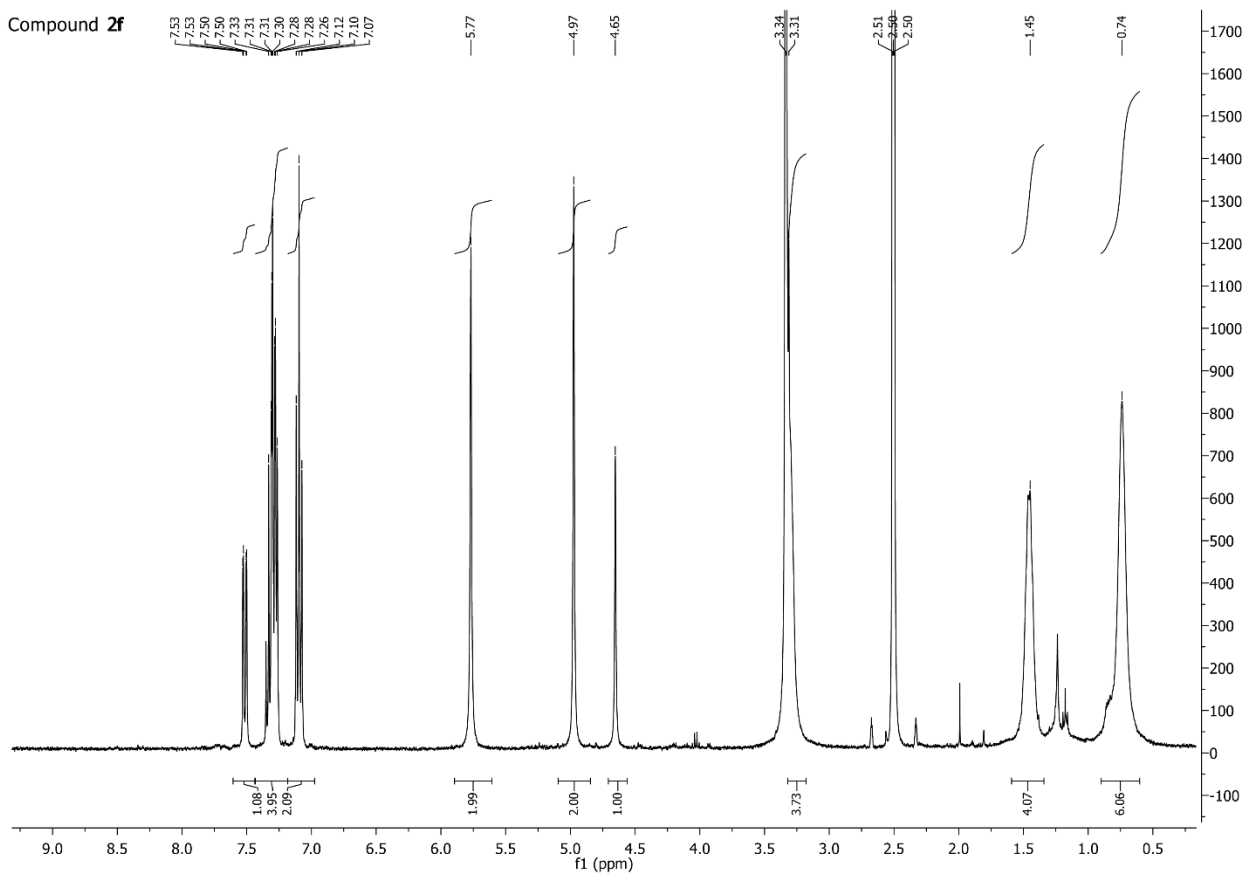

Figure S13. NMR (400 MHz, DMSO-*d*<sub>6</sub>) Spectrum for **2f**



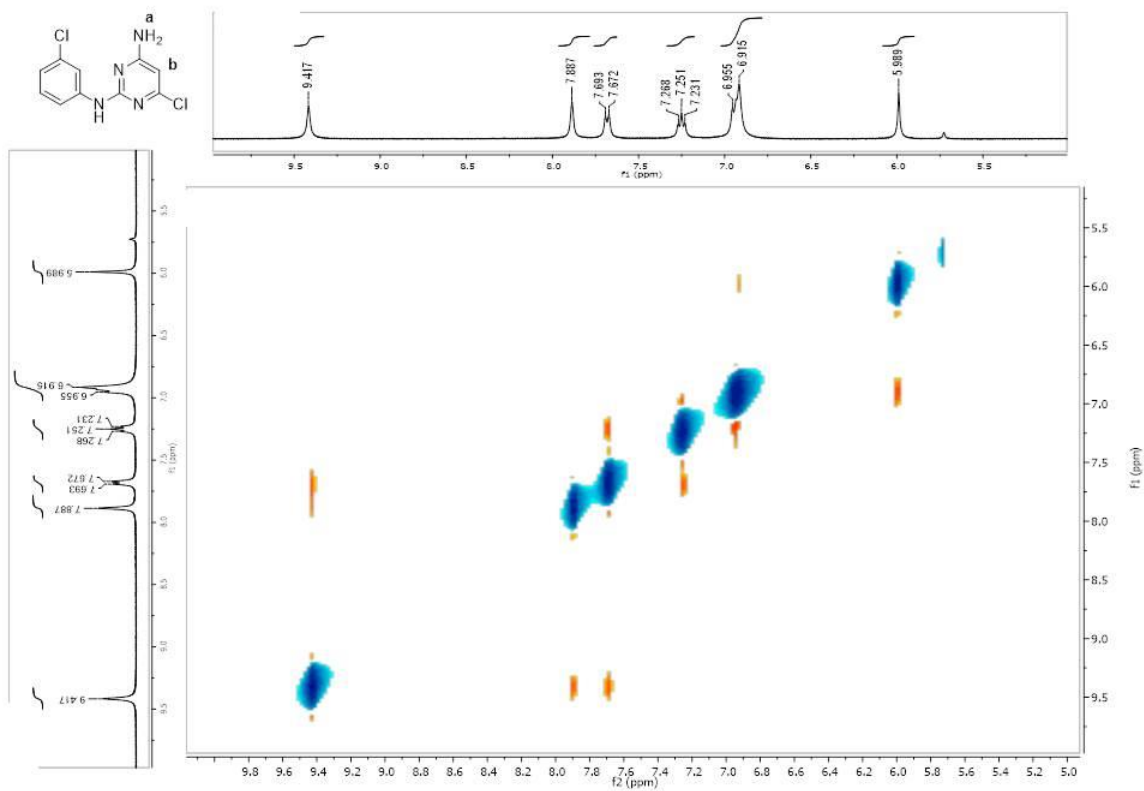

Figure S15. 2D-NMR (400 MHz,  $\text{DMSO-}d_6$ ) Spectrum for **4a**. The singlet at 5.98 ppm correlates with the broad singlet at 6.90 ppm: these signals correspond respectively to  $\text{H}_b$  and  $\text{NH}_2$  of pyrimidine moiety. The cross peak indicates the closeness of  $\text{H}_b$  to  $\text{NH}_2$  and confirms the structure reported for compound **4a**



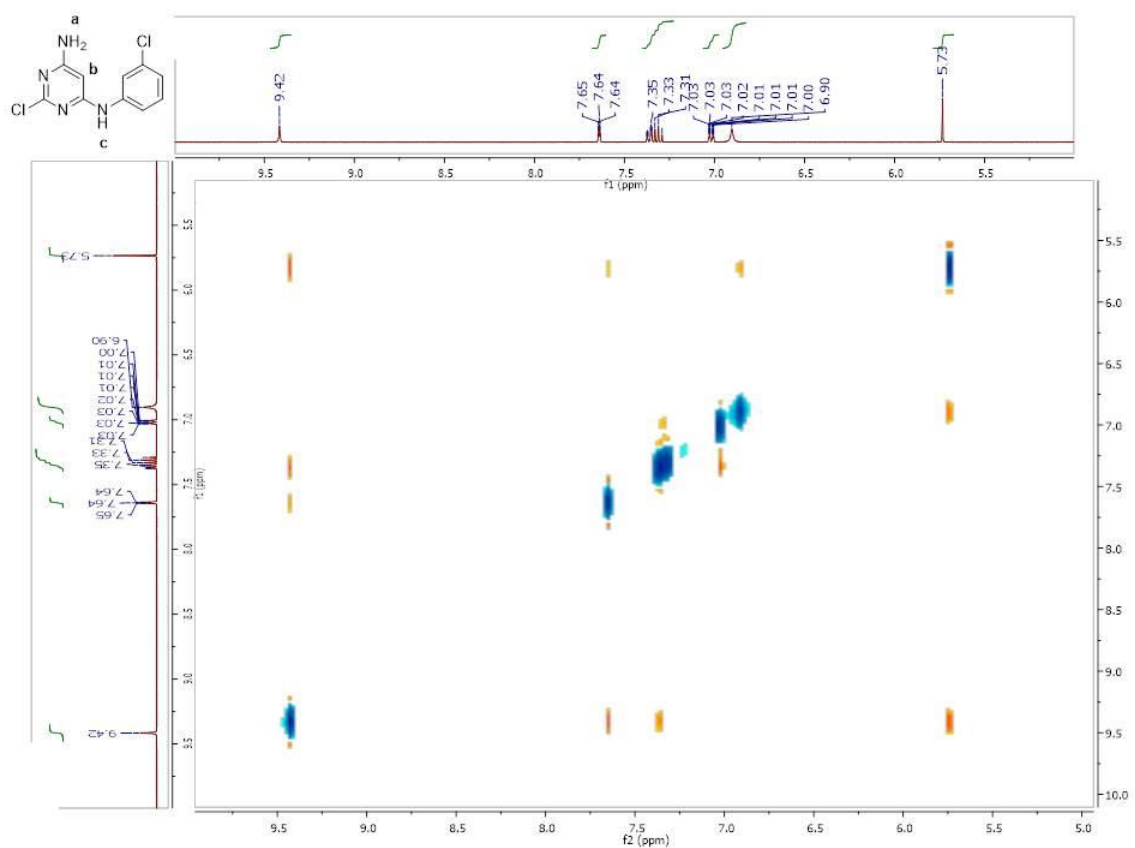

Figure S16. 2D-NMR (400 MHz, DMSO-*d*<sub>6</sub>) spectra for the regioisomer of compound **4a** (namely **4a'**). The singlet at 5.78 ppm correlates with the broad singlet at 6.90 ppm and with the singlet at 9.42 ppm: these signals correspond respectively to H<sub>b</sub> and NH<sub>2</sub> of pyrimidine moiety and NH (H<sub>c</sub>) of the aniline portion. In this spectrum there are NOE correlations between the hydrogens of pyrimidine moiety and the H<sub>c</sub> of the aniline portion and this confirms the structure reported for compound **4a'**.
